# Supplementary material for: Antimicrobial, Antibiofilm, and Antioxidant Properties of Essential Oil of Foeniculum vulgare Mill. Leaves
Source: MDPI journal article supplement (doi:10.3390/plants11243573), 2022-12-17
Supplement: s1 [file s1]

**Table S1.** Chemical composition of the EOs of leaves of *F. vulgare* subsp. *vulgare* var. *vulgare* from Sicily.

| No.                      | Component                                    | LRI <sup>a</sup> | LRI <sup>b</sup> | Area (%) |
|--------------------------|----------------------------------------------|------------------|------------------|----------|
| 1                        | $\alpha$ -Pinene <sup>c</sup>                | 938              | 1025             | 33.75    |
| 2                        | Sabinene <sup>c</sup>                        | 974              | 1123             | 3.63     |
| 3                        | $\beta$ -Pinene <sup>c</sup>                 | 976              | 1102             | 5.13     |
| 4                        | Myrcene <sup>c</sup>                         | 989              | 1154             | 5.25     |
| 5                        | $\alpha$ -Phellandrene                       | 1001             | 1158             | 2.05     |
| 6                        | $\delta$ -3-Carene                           | 1010             | 1140             | 6.12     |
| 7                        | <i>p</i> -Cymene                             | 1051             | 1243             | 9.45     |
| 8                        | Fenchone                                     | 1081             | 1391             | 1.85     |
| 9                        | ( <i>E,Z</i> )-2,6-Dimethyl-2,4,6-octatriene | 1130             | 1382             | 0.26     |
| 10                       | <i>exo</i> -Fenchol                          | 1135             | 1598             | 0.14     |
| 11                       | <i>trans</i> -Sabinol                        | 1144             | 1720             | 0.10     |
| 12                       | 4-Terpineol <sup>c</sup>                     | 1176             | 1601             | 0.07     |
| 13                       | Estragole                                    | 1187             | 1677             | 25.06    |
| 14                       | Fenchyl acetate                              | 1207             | 1468             | 0.13     |
| 15                       | ( <i>E</i> )-Anethole <sup>c</sup>           | 1300             | 1833             | 5.30     |
| Monoterpene hydrocarbons |                                              |                  |                  | 65.64    |
| Oxygenated monoterpenes  |                                              |                  |                  | 2.29     |
| Phenylpropanoids         |                                              |                  |                  | 30.36    |
| Total                    |                                              |                  |                  | 99.83    |

<sup>a</sup> Linear retention index on a HP-5MS column; <sup>b</sup> Linear retention index on a DB5 column; <sup>c</sup> Co-elution with authentic sample.
